# Supplementary material for: Bioinspired electron carrier mediated transmembrane photocatalytic hydrogen evolution in silica colloidosomes
Source: Royal Society of Chemistry journal article supplement (doi:10.1039/d4qi02015d), 2024-01-01
Supplement: d4qi02015d1.pdf [file d4qi02015d1.pdf]

## Supporting Information

### Bioinspired Electron Carrier Mediated Transmembrane

### Photocatalytic Hydrogen Evolution in Silica Colloidosomes

Chengkun Bai,<sup>a</sup> Bingdi Wang,<sup>a</sup> Zhengshun Jiang,<sup>a</sup> Chunying Lv,<sup>a</sup> Zhenning Liu,<sup>a</sup> Shiyu Wang,<sup>c</sup> Songliang,<sup>\*a</sup> Hongying Zang<sup>\*b</sup>

- Key Laboratory of Bionic Engineering (Ministry of Education), College of Biological and Agricultural Engineering, Jilin University, Changchun, 130022 P. R. China.
- Key Laboratory of Polyoxometalate Science of the Ministry of Education, Faculty of Chemistry, Northeast Normal University, Changchun, 130024 P. R. China
- Key Laboratory of High Performance Plastics, Ministry of Education, College of Chemistry, Jilin University, Changchun, 130012 P. R. China.

\*Corresponding authors.

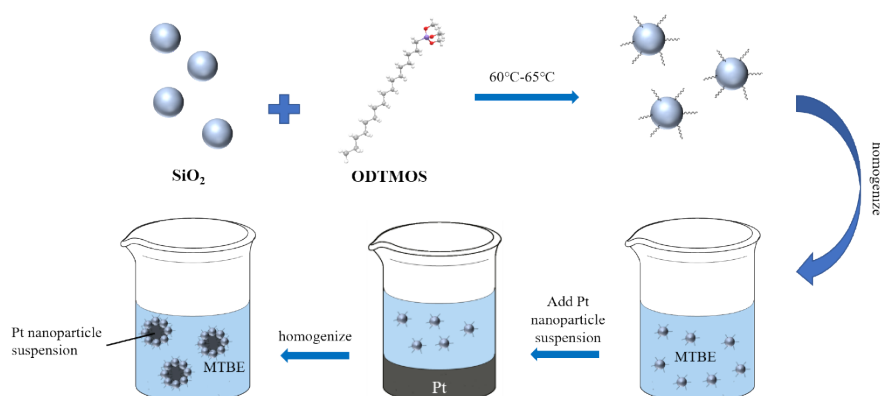

Fig. S1. Schematic illustration of the preparation process of Pt@OD-SiO<sub>2</sub>.

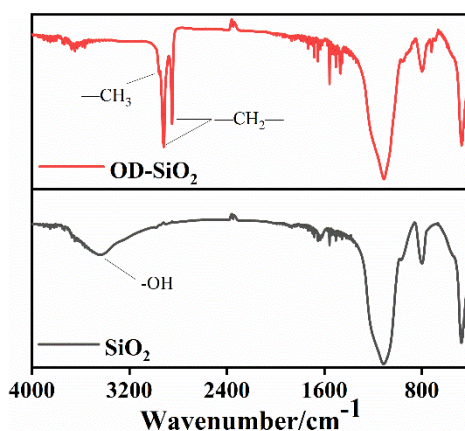

Fig. S2. Fourier transform infrared (FTIR) spectroscopy of SiO<sub>2</sub> and OD-SiO<sub>2</sub>.

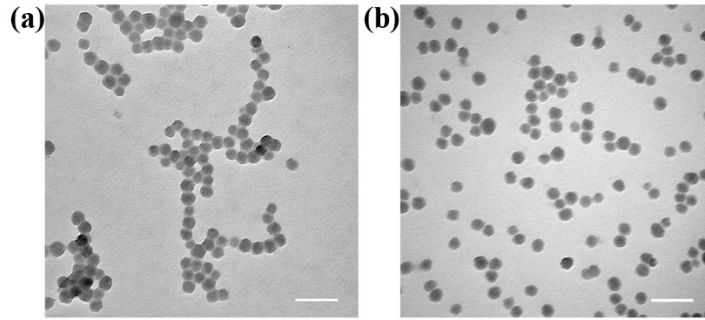

Fig. S3. TEM images of (a) SiO<sub>2</sub> and (b) OD-SiO<sub>2</sub>. Scale bar:100 nm.

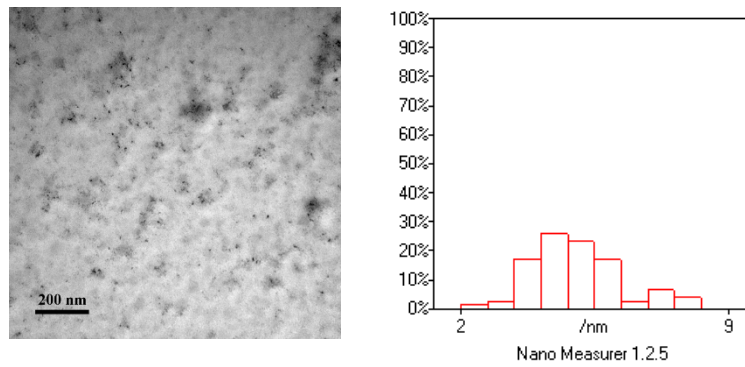

Fig. S4. TEM images of Pt nanoparticles.

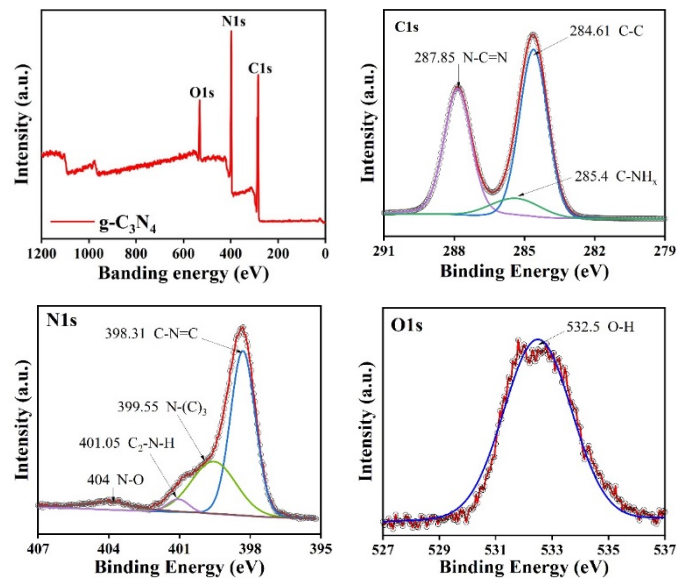

Fig. S5. The XPS images of g-C<sub>3</sub>N<sub>4</sub>

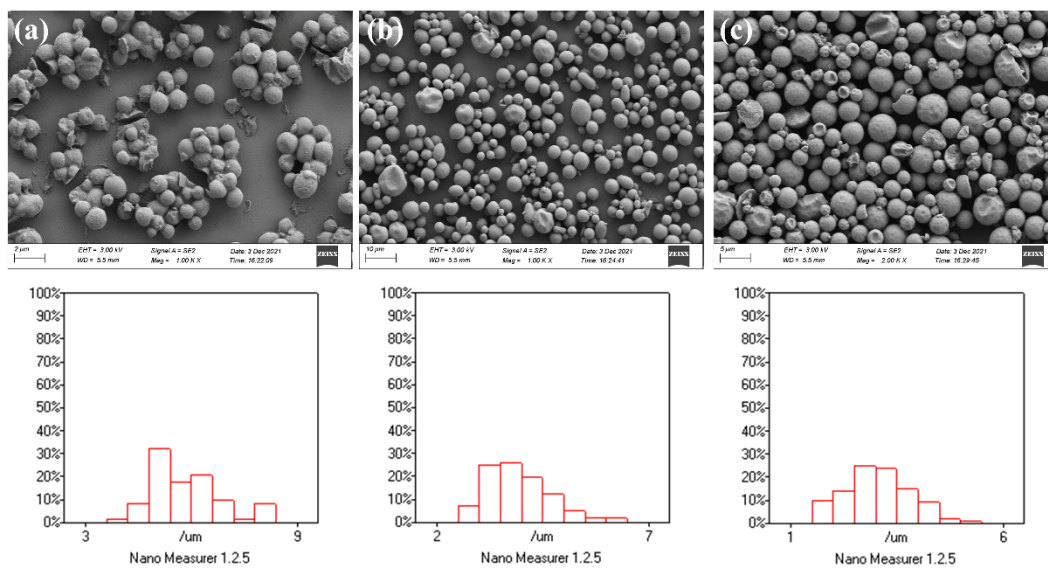

Fig. S6. The size distribution of colloidosomes with three different R values. (a)  $R = 0.05$  g/ml, (b)  $R = 0.1$  g/ml, (c)  $R = 0.2$  g/ml.

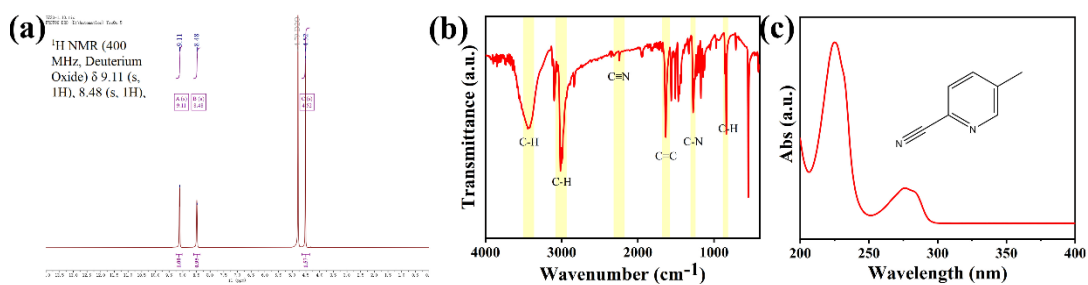

Fig. S7. The  $^1\text{H}$  NMR spectra (a), FTIR spectra (b) and UV-vis absorption spectra (c) of  $\text{MCP}^+$ .

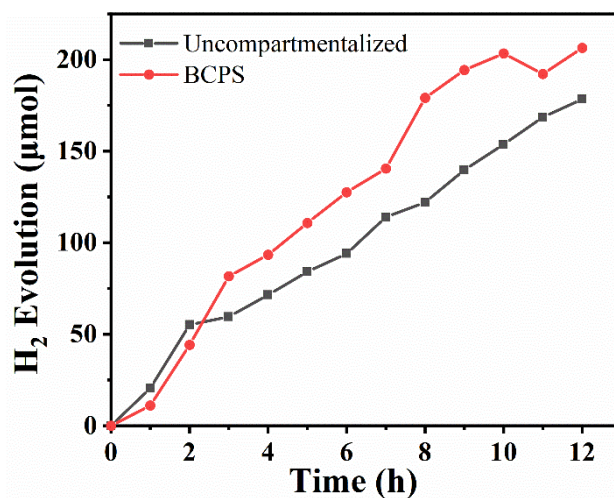

Figure S8. Hydrogen evolution of the BCPS and control group within 12 h.

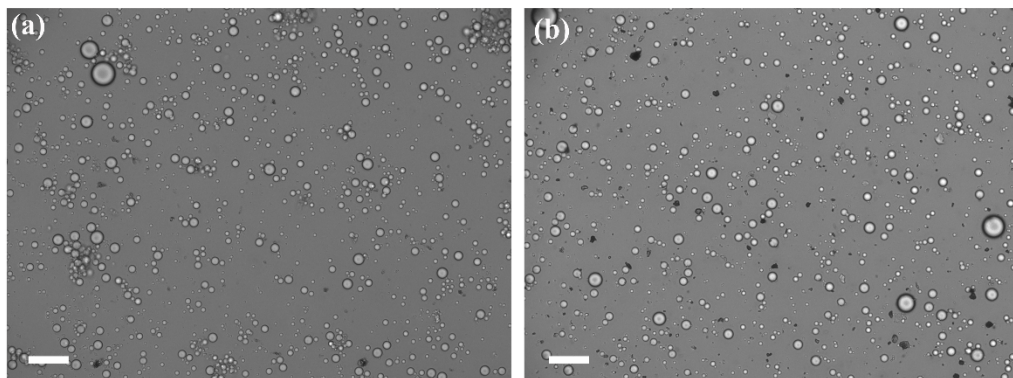

Figure S9. Microscopy images of the colloidosomes in the BCPS system before (a) and after (b) the reaction (Scale bar: 100  $\mu\text{m}$ ). The opaque sheet-like structures in (b) correspond to  $g\text{-C}_3\text{N}_4$ .

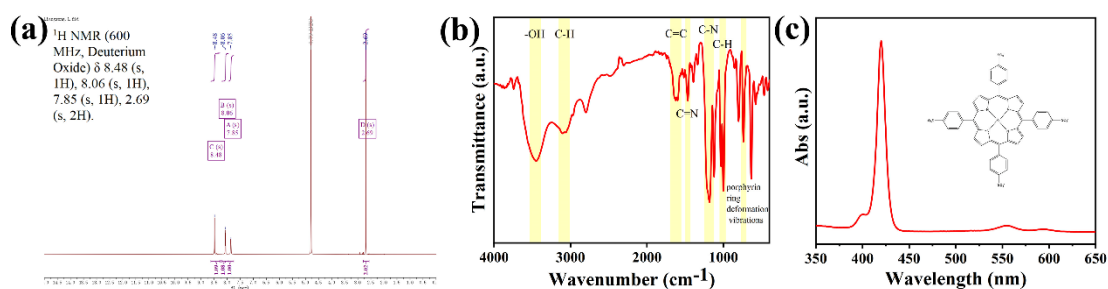

Fig. S10. The  $^1\text{H}$  NMR spectra (a), FTIR spectra (b) and UV-vis absorption spectra (c) of ZnTPPS. The signal at  $\delta$  2.69 (s, 2H) originates from the  $-\text{CH}_3$  group in zinc acetate

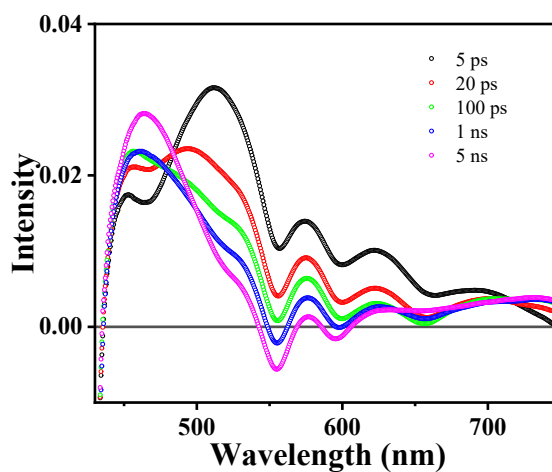

Fig. S11. Time-resolved transient fluorescence spectroscopy of ZnTPPS.

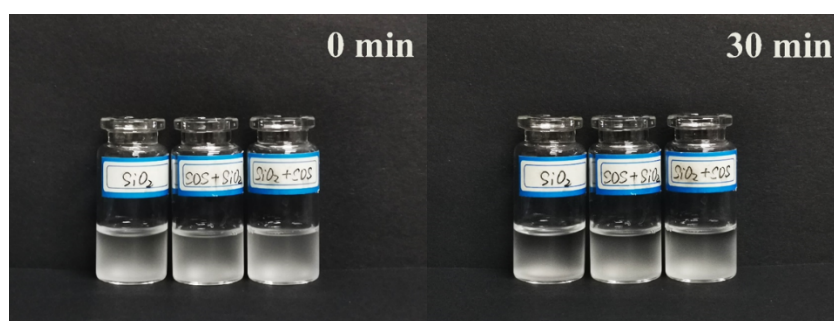

Fig. S12. Photographs of OD-SiO<sub>2</sub> colloidosomes and SDS-containing OD-SiO<sub>2</sub> colloidosomes after standing for 30 min.

Table 1 Summary of photocatalytic reactions in microreactors with different photocatalyst

| Photocatalysts                                                               | Applications                                  | Year | Ref. |
|------------------------------------------------------------------------------|-----------------------------------------------|------|------|
| PDA-TiO <sub>2</sub> @clay                                                   | degradation of methylene blue and rhodamine B | 2018 | 1    |
| TiO <sub>2</sub>                                                             | degradation of nitrobenzene                   | 2020 | 2    |
| TiO <sub>2</sub>                                                             | degradation in continuous flow                | 2019 | 3    |
| TiO <sub>2</sub>                                                             | dye encapsulation and release                 | 2020 | 4    |
| Janus TiO <sub>2</sub>                                                       | degradation of kerosene or nitrobenzene       | 2019 | 5    |
| Janus TiO <sub>2</sub>                                                       | degradation of dye                            | 2020 | 6    |
| Graphene oxide-Fe (III)                                                      | reduction of Cr (VI)                          | 2020 | 7    |
| Graphene oxide/TiO <sub>2</sub>                                              | degradation of 2-naphthol                     | 2021 | 8    |
| Ag <sub>3</sub> PO <sub>4</sub> /graphdiyne                                  | degradation and oxygen evolution              | 2019 | 9    |
| Ag <sub>3</sub> PO <sub>4</sub> @palygorskite                                | degradation of tetradecane                    | 2020 | 10   |
| Polymer particles                                                            | degradation of dye                            | 2020 | 11   |
| PbS QDs                                                                      | degradation of methyl orange                  | 2022 | 12   |
| JMPSN/ $\alpha$ -FeOOH                                                       | degradation of dye                            | 2023 | 13   |
| g-C <sub>3</sub> N <sub>4</sub> /P25                                         | degradation of dye                            | 2022 | 14   |
| G-C <sub>3</sub> N <sub>4</sub>                                              | treatment of oily sewage                      | 2023 | 15   |
| g-C <sub>3</sub> N <sub>4</sub>                                              | degradation of dye                            | 2022 | 16   |
| Pt/TiO <sub>2</sub>                                                          | H <sub>2</sub> production                     | 2021 | 17   |
| Ag <sub>2</sub> O-TiO <sub>2</sub> /SiO <sub>2</sub>                         | H <sub>2</sub> production                     | 2019 | 18   |
| Janus TiO <sub>2</sub>                                                       | H <sub>2</sub> production                     | 2018 | 19   |
| Co <sub>3</sub> O <sub>4</sub> /g-C <sub>3</sub> N <sub>4</sub> nanovesicles | Catalytic hydrogenation                       | 2018 | 20   |
| algal/bacterial cell                                                         | H <sub>2</sub> production                     | 2020 | 21   |

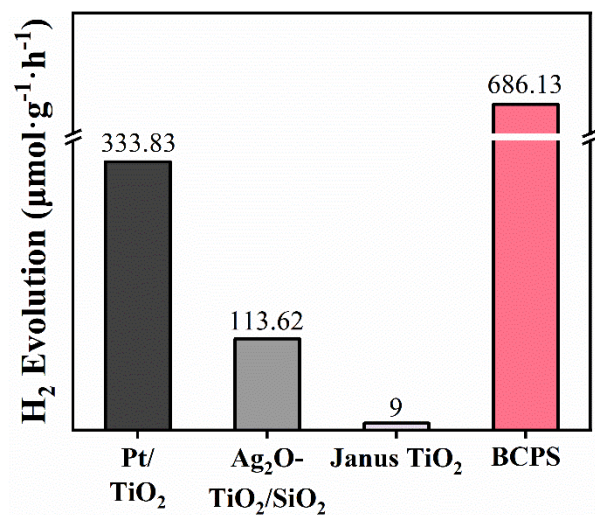

Figure S13. Comparison with other photocatalytic hydrogen production microreactors.



## References

1. S. Lin, S. Sun, K. Shen, D. Tan, H. Zhang, F. Dong and X. Fu, Photocatalytic microreactors based on nano TiO<sub>2</sub>-containing clay colloidosomes, *Applied Clay Science*, 2018, **159**, 42-49.
2. N. Fessi, M. F. Nsib, Y. Chevalier, C. Guillard, F. Dappozze, A. Houas, L. Palmisano and F. Parrino, Pickering Emulsions of Fluorinated TiO<sub>2</sub>: A New Route for Intensification of Photocatalytic Degradation of Nitrobenzene, *Langmuir*, 2020, **36**, 13545-13554.
3. Q. Li, T. Zhao, M. Li, W. Li, B. Yang, D. Qin, K. Lv, X. Wang, L. Wu, X. Wu and J. Sun, One-step construction of Pickering emulsion via commercial TiO<sub>2</sub> nanoparticles for photocatalytic dye degradation, *Applied Catalysis B: Environmental*, 2019, **249**, 1-8.
4. J. S. J. Tan, X. Cao, Y. Huang and Z. Chen, Janus-like particles prepared through partial UV irradiation at the water/oil interface and their encapsulation capabilities, *Colloids and Surfaces A: Physicochemical and Engineering Aspects*, 2020, **589**, 124460.
5. Y. Shi, Q. Zhang, Y. Liu, J. Chang and J. Guo, Preparation of amphiphilic TiO<sub>2</sub> Janus particles with highly enhanced photocatalytic activity, *Chinese Journal of Catalysis*, 2019, **40**, 786-794.
6. Y. Zhou, F. Shen, S. Zhang, Q. Zhao, Z. Xu and H. Chen, Synthesis of Methyl-Capped TiO<sub>2</sub>-SiO<sub>2</sub> Janus Pickering Emulsifiers for Selective Photodegradation of Water-Soluble Dyes, *ACS Applied Materials & Interfaces*, 2020, **12**, 29876-29882.
7. Z. Chen, X. Liu, C. Huang, J. Li and X. Shen, Artificial Cytochrome c Mimics: Graphene Oxide-Fe(III) Complex-Coated Molecularly Imprinted Colloidosomes for Selective Photoreduction of Highly Toxic Pollutants, *ACS Applied Materials & Interfaces*, 2020, **12**, 6615-6626.
8. Y. Lan, M. Yu, D. He, Y. Wang, Q. B. Meng, H. Huang, Y. Zhang, T. Ma and X.-M. Song, Pickering emulsion-embedded hierarchical solid-liquid hydrogel spheres for static and flow photocatalysis, *Journal of Colloid and Interface Science*, 2021, **589**, 587-596.
9. S. Guo, Y. Jiang, F. Wu, P. Yu, H. Liu, Y. Li and L. Mao, Graphdiyne-Promoted Highly Efficient Photocatalytic Activity of Graphdiyne/Silver Phosphate Pickering Emulsion Under Visible-Light Irradiation, *ACS Applied Materials & Interfaces*, 2019, **11**, 2684-2691.
10. C. Han, Y. Li, W. Wang, Y. Hou and D. Chen, Dual-functional Ag<sub>3</sub>PO<sub>4</sub>@palygorskite composite for efficient photodegradation of alkane by in situ forming Pickering emulsion photocatalytic system, *Science of The Total Environment*, 2020, **704**, 135356.
11. D. Kim, H. Kim and J. Y. Chang, Designing Internal Hierarchical Porous Networks in Polymer Monoliths that Exhibit Rapid Removal and Photocatalytic Degradation of Aromatic Pollutants, *Small*, 2020, **16**, 1907555.
12. Z. Huang, J. T. Koubek, A. Sellinger and M. C. Beard, Pickering Emulsions of Self-Assembled Lead Sulfide Quantum Dots with Janus-Ligand Shells as Nanoreactors for Photocatalytic Reactions, *ACS Applied Nano Materials*, 2022, **5**, 3183-3187.
13. B. Wang, K. Li, J. Yan and T. Zhou, Synthesis of functionalized janus hybrid nanosheets for one-step construction of pickering emulsion and selective photodegradation of water-soluble dyes, *Colloids and Surfaces A: Physicochemical and Engineering Aspects*, 2023, **664**, 131199.
14. S. Liu, S. Wang, C. Lei, R. Li, S. Feng and Q. Jin, Study of the efficiency of g-C<sub>3</sub>N<sub>4</sub>-loaded P25 for photocatalytic degradation of malachite green in aqueous and Pickering emulsion

- systems, *Journal of Materials Science: Materials in Electronics*, 2022, **33**, 5846-5858.
15. B. Su, X. Ma, L. Ran, S. Wu and B. Hou, Improving the photodegradation efficiency of POPs in oily sewage: Design and synthesis of G-C<sub>3</sub>N<sub>4</sub>-based photocatalysts incorporating a pickering emulsion catalytic strategy, *Journal of Environmental Chemical Engineering*, 2023, **11**, 111297.
  16. X. Zhang, H. Zhang, P. Chen, M. Liu, P. Wu, C. Liu and W. Jiang, One-step dye wastewater treatment by combined adsorption, extraction, and photocatalysis using g-C<sub>3</sub>N<sub>4</sub> pickering emulsion, *Colloids and Surfaces A: Physicochemical and Engineering Aspects*, 2022, **644**, 128814.
  17. C. Wang, W. Zhong, S. Peng, J. Zhang, R. Shu, Z. Tian, Q. Song and Y. Chen, Robust Hydrogen Production via Pickering Interfacial Catalytic Photoreforming of n-Octanol-Water Biphasic System, *Frontiers in Chemistry*, 2021, **9**.
  18. E. Bu, Y. Chen, C. Wang, Z. Cheng, X. Luo, R. Shu, J. Zhang, M. Liao, Z. Jiang and Q. Song, Hydrogen production from bio-derived biphasic photoreforming over a raspberry-like amphiphilic Ag<sub>2</sub>O-TiO<sub>2</sub>/SiO<sub>2</sub> catalyst, *Chemical Engineering Journal*, 2019, **370**, 646-657.
  19. C. Wang, E. Bu, Y. Chen, Z. Cheng, J. Zhang, R. Shu and Q. Song, Enhanced photoreforming hydrogen production: Pickering interfacial catalysis from a bio-derived biphasic system, *Renewable Energy*, 2019, **134**, 113-124.
